# Supplementary material
Source: MDPI journal article supplement (https://www.mdpi.com/1999-4907/11/10/1035)
Supplement: s1 [file s1]

Article

# Diseases of Eucalypts in Paraguay and first report of *Teratosphaeria zuluensis* from South America

Supplementary Materials:

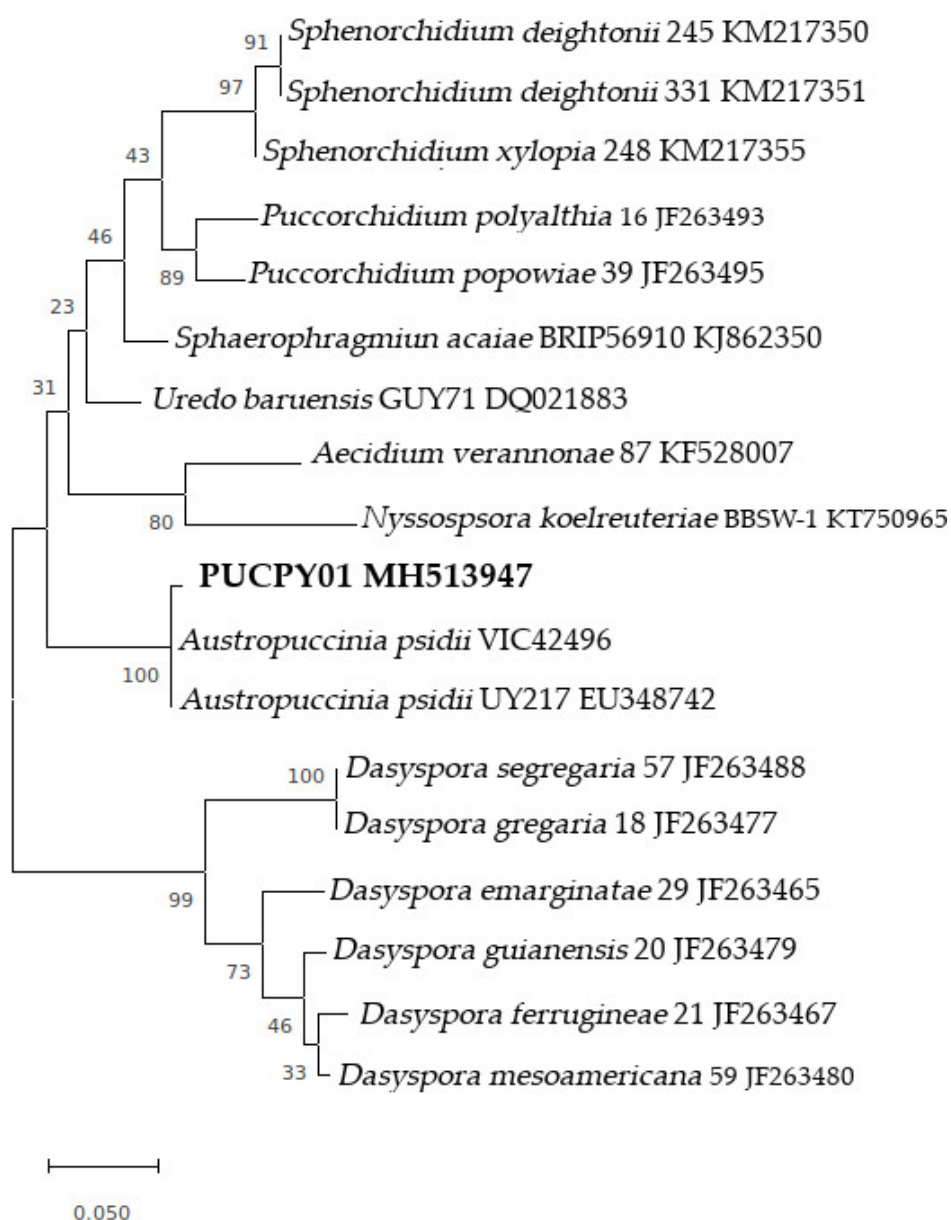

**Figure S1.** Phylogram based on the analysis of ITS region for *Austropuccinia* rust found in eucalypts leaves in Paraguay. Bootstrap confidence values (1000 replicates) are indicated above the internodes. The tree is rooted in *Dasyscypha segregaria*.
